# Supplementary material for: Suppressing the effect of lithium dendritic growth by the addition of magnesium bis(trifluoromethanesulfonyl)amide
Source: Royal Society of Chemistry journal article supplement (doi:10.1039/c7cp06057b), 2017-12-05
Supplement: c7cp06057b1.pdf [file c7cp06057b1.pdf]

# Electronic Supplementary Information (ESI)

## Suppressing the effect of lithium dendritic growth by the addition of magnesium bis(trifluoromethanesulfonyl)amide

<sup>†</sup> Department of Materials Chemistry, Faculty of Engineering, Shinshu University

<sup>‡</sup> Institute of Carbon Science and Technology, Faculty of Engineering, Shinshu University

Masahiro Shimizu<sup>\*ab</sup>, Makoto Umeki<sup>a</sup>, Susumu Arai<sup>\*ab</sup>

Dr. Masahiro Shimizu

E-mail: [shimizu@shinshu-u.ac.jp](mailto:shimizu@shinshu-u.ac.jp)

Tel: +81-26-269-5627; Fax: +81-26-269-5627

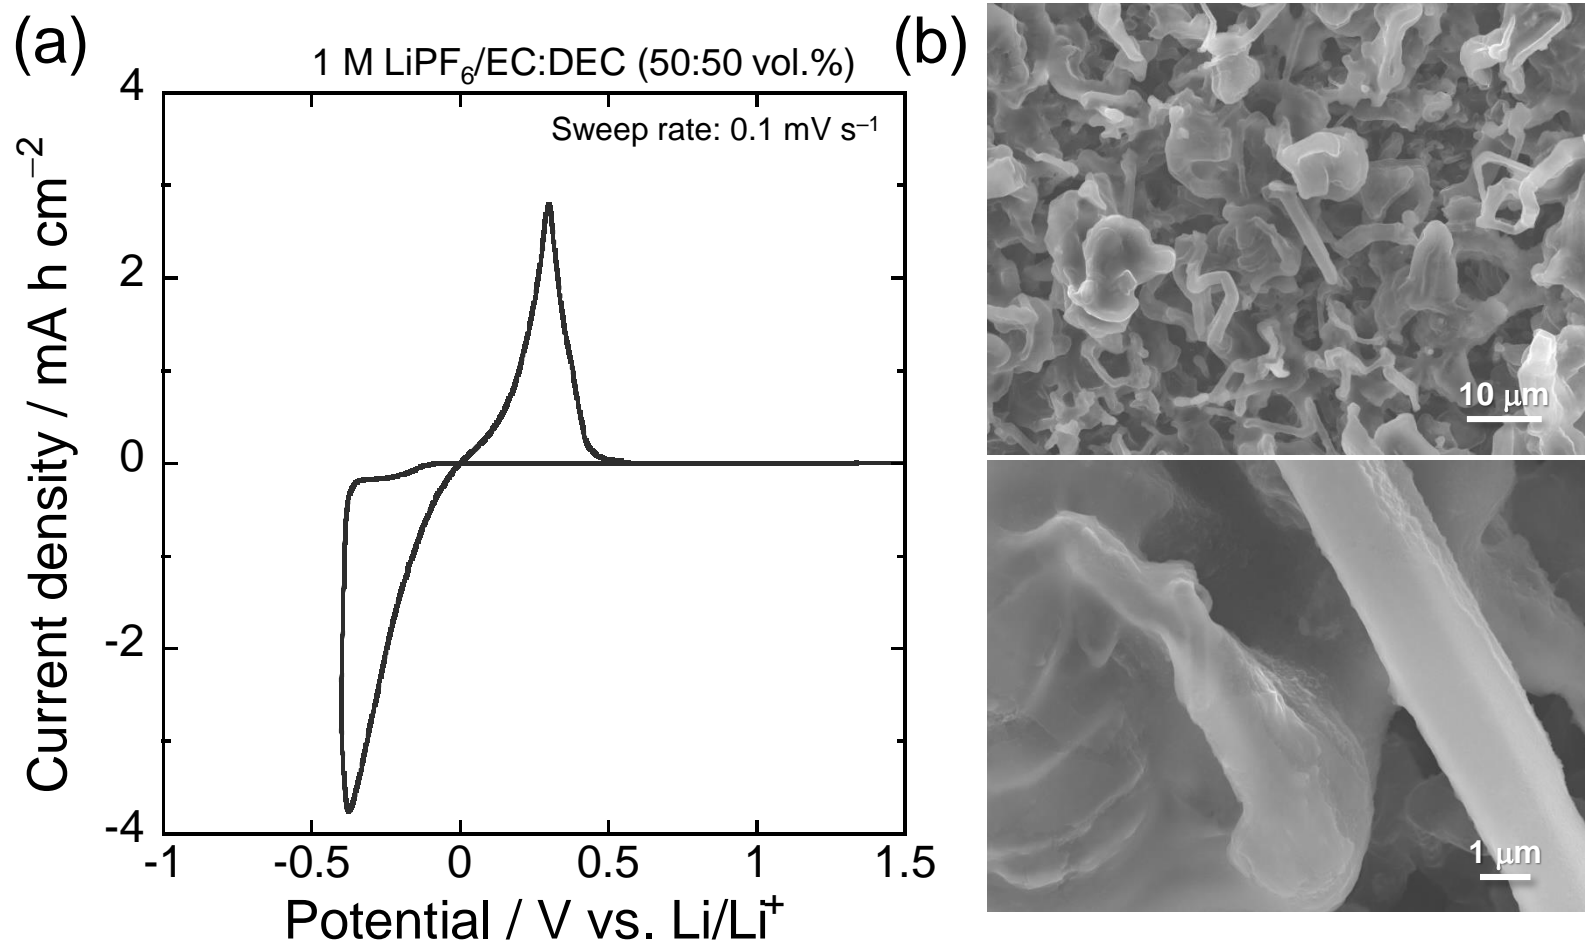

**Figure S1.** (a) CV profile of Li-deposition/dissolution behavior on a Cu substrate in a commercial electrolyte of 1 M LiPF<sub>6</sub>/EC:DEC (50:50 vol.%) at a sweep rate of 0.1 mV s<sup>-1</sup>. (b) FE-SEM images of deposited Li at a constant potential of -0.4 V vs. Li/Li<sup>+</sup> for 10 h.

## 1.0 M LiTFSA/G3 (Mg-salt free)

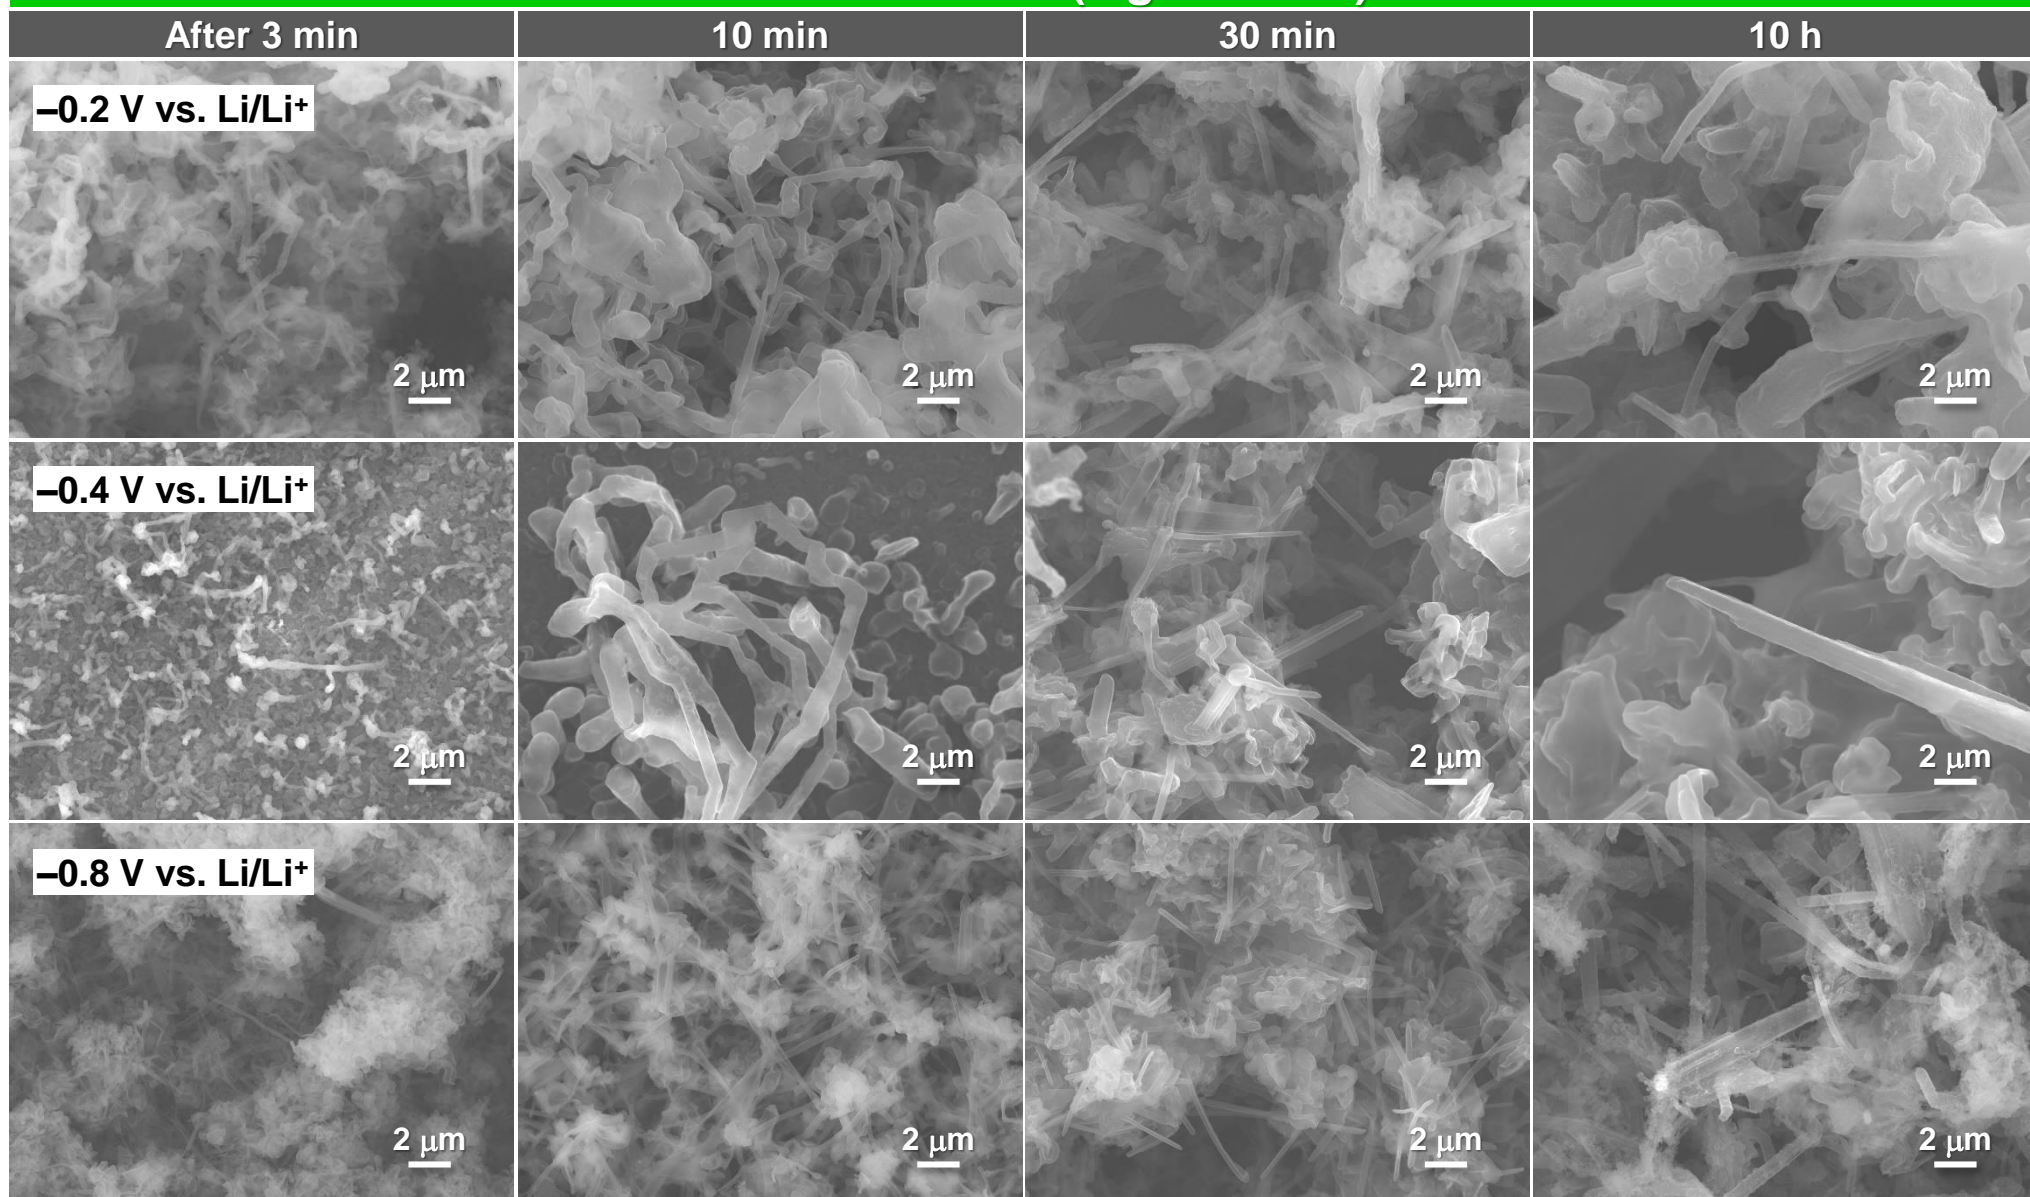

**Figure S2.** Enlarged views of FE-SEM images for deposits obtained from 1.0 M LiTFSA/G3 at various potentials:  $-0.2$  V,  $-0.4$  V, and  $-0.8$  V vs. Li/Li<sup>+</sup>.

0.1 M Mg(TFSA)<sub>2</sub> + 0.9 M LiTFSA /G3

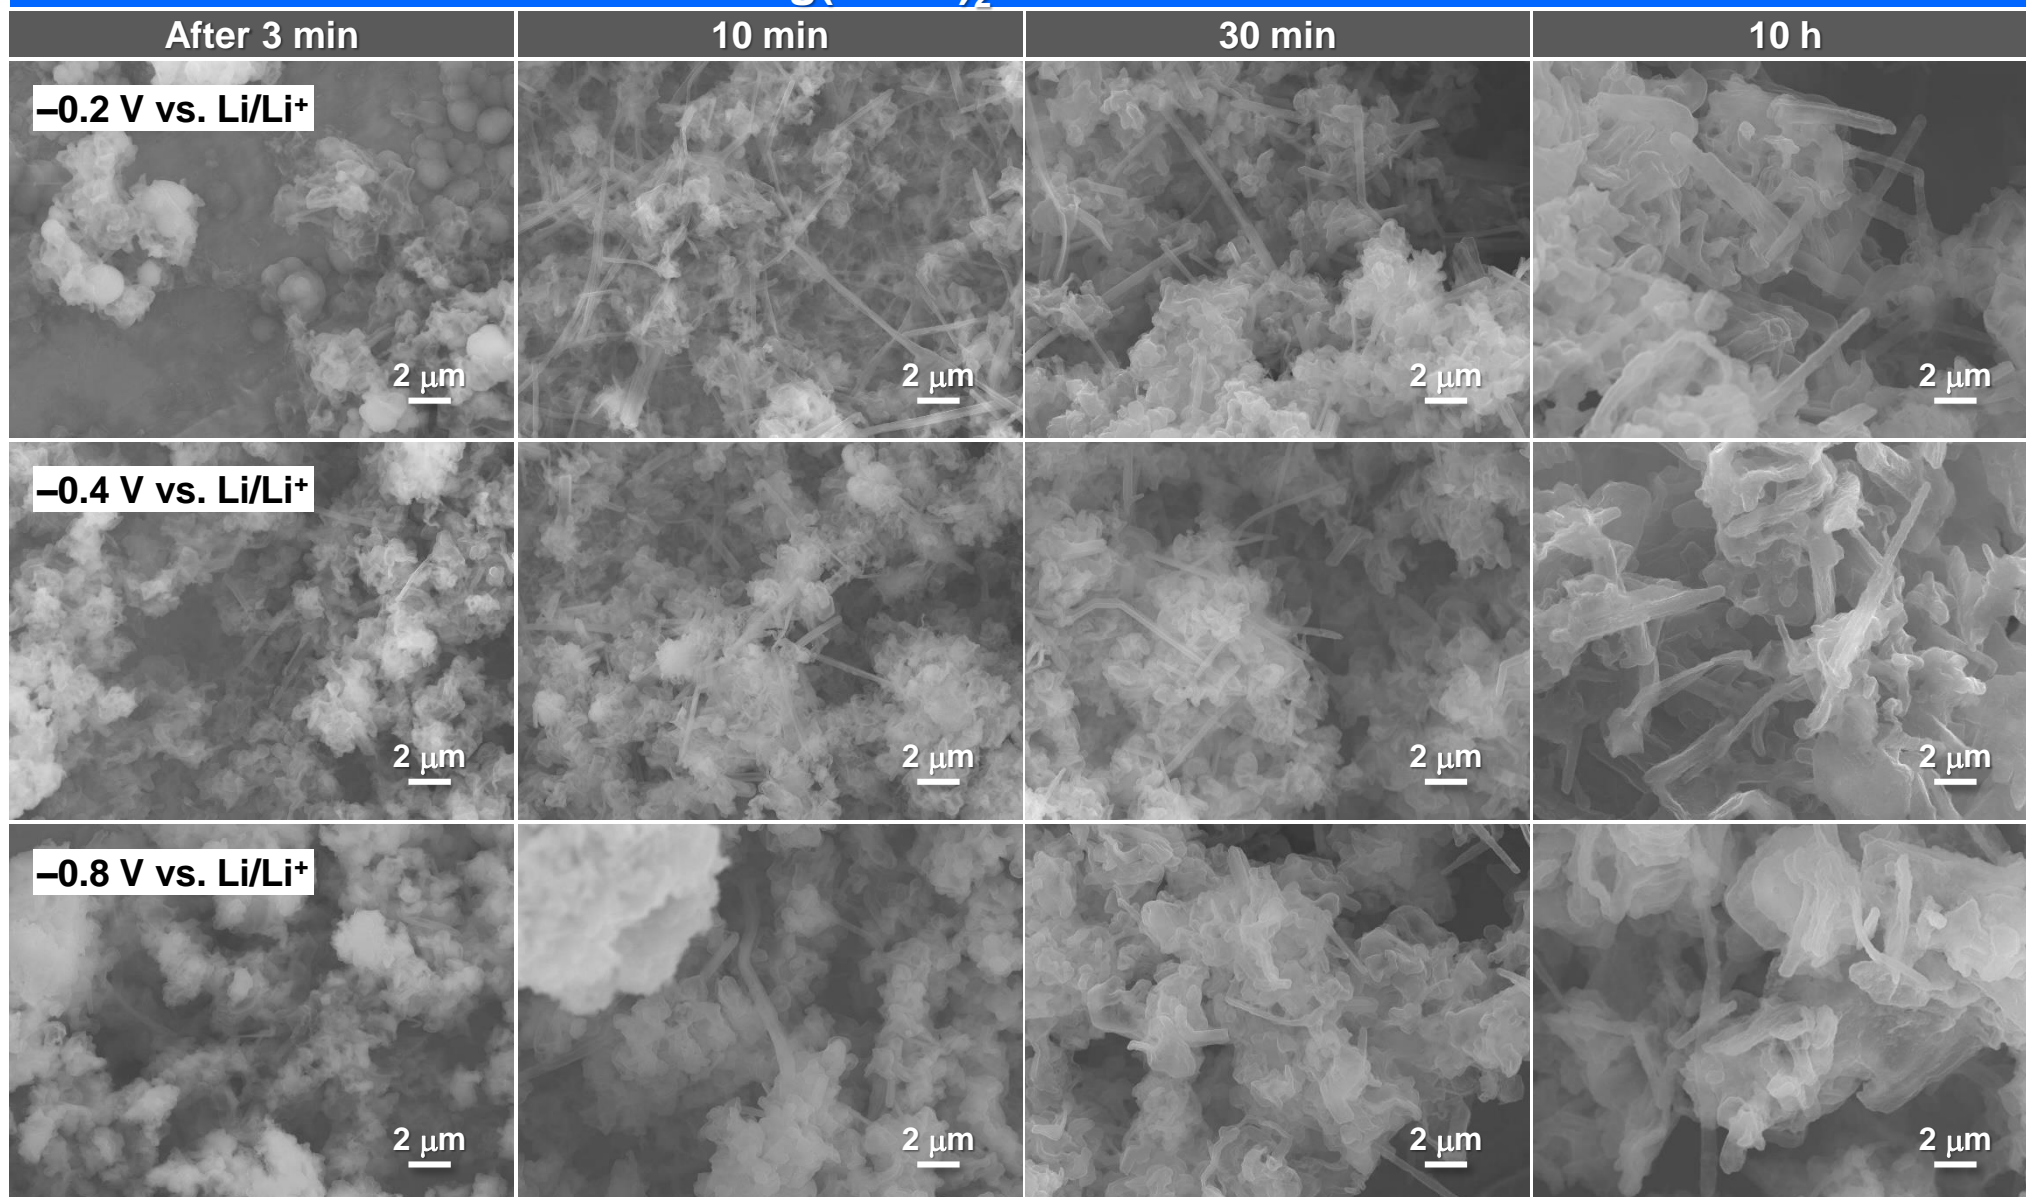

**Figure S3.** Enlarged views of FE-SEM images for deposits obtained from 0.1 M Mg(TFSA)<sub>2</sub> + 0.9 M LiTFSA/G3: at various potentials vs. Li/Li<sup>+</sup>.

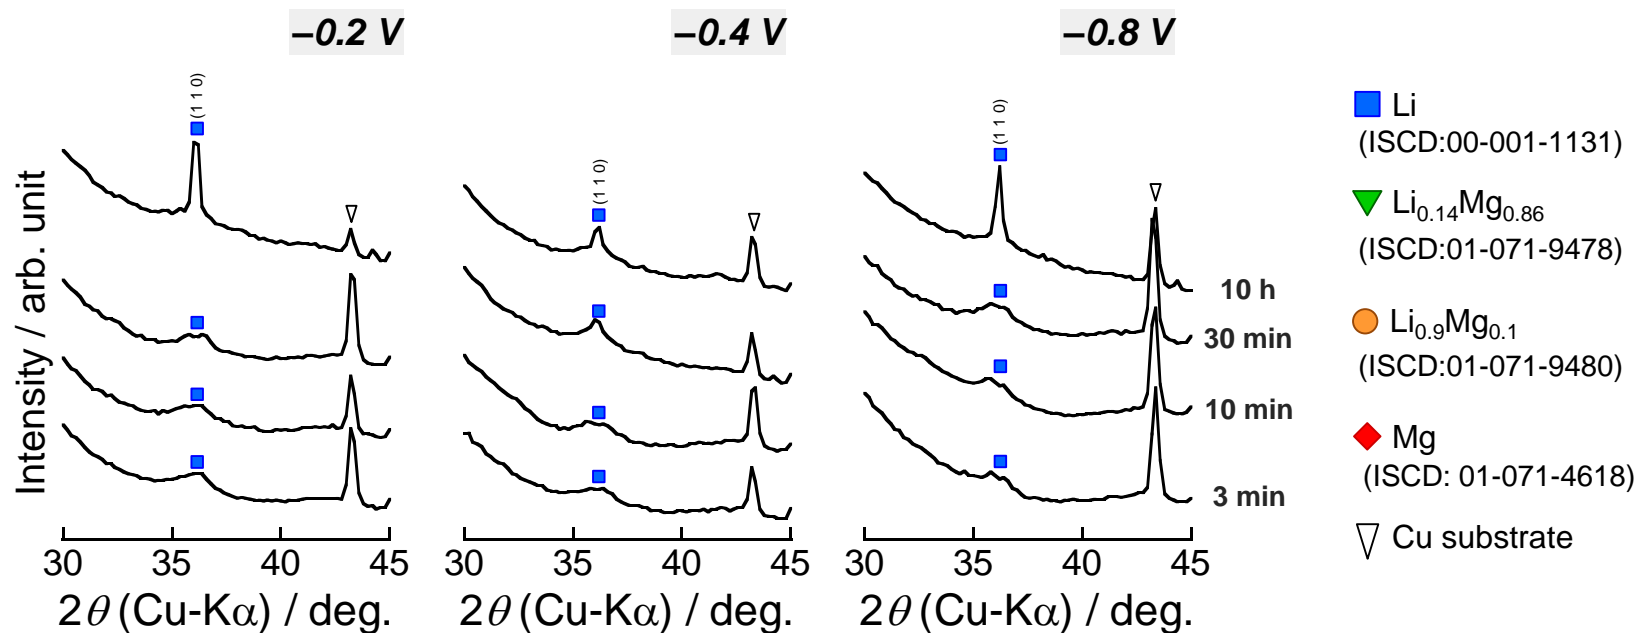

**Figure S4.** XRD patterns of deposits electrochemically grown on a Cu substrate in electrolytes of 0.1 M  $\text{Mg}(\text{TFSA})_2$  + 0.9 M  $\text{LiTFSA/G3}$  at each time under various constant potential.

0.5 M Mg(TFSA)<sub>2</sub> + 0.5 M LiTFSA/G3

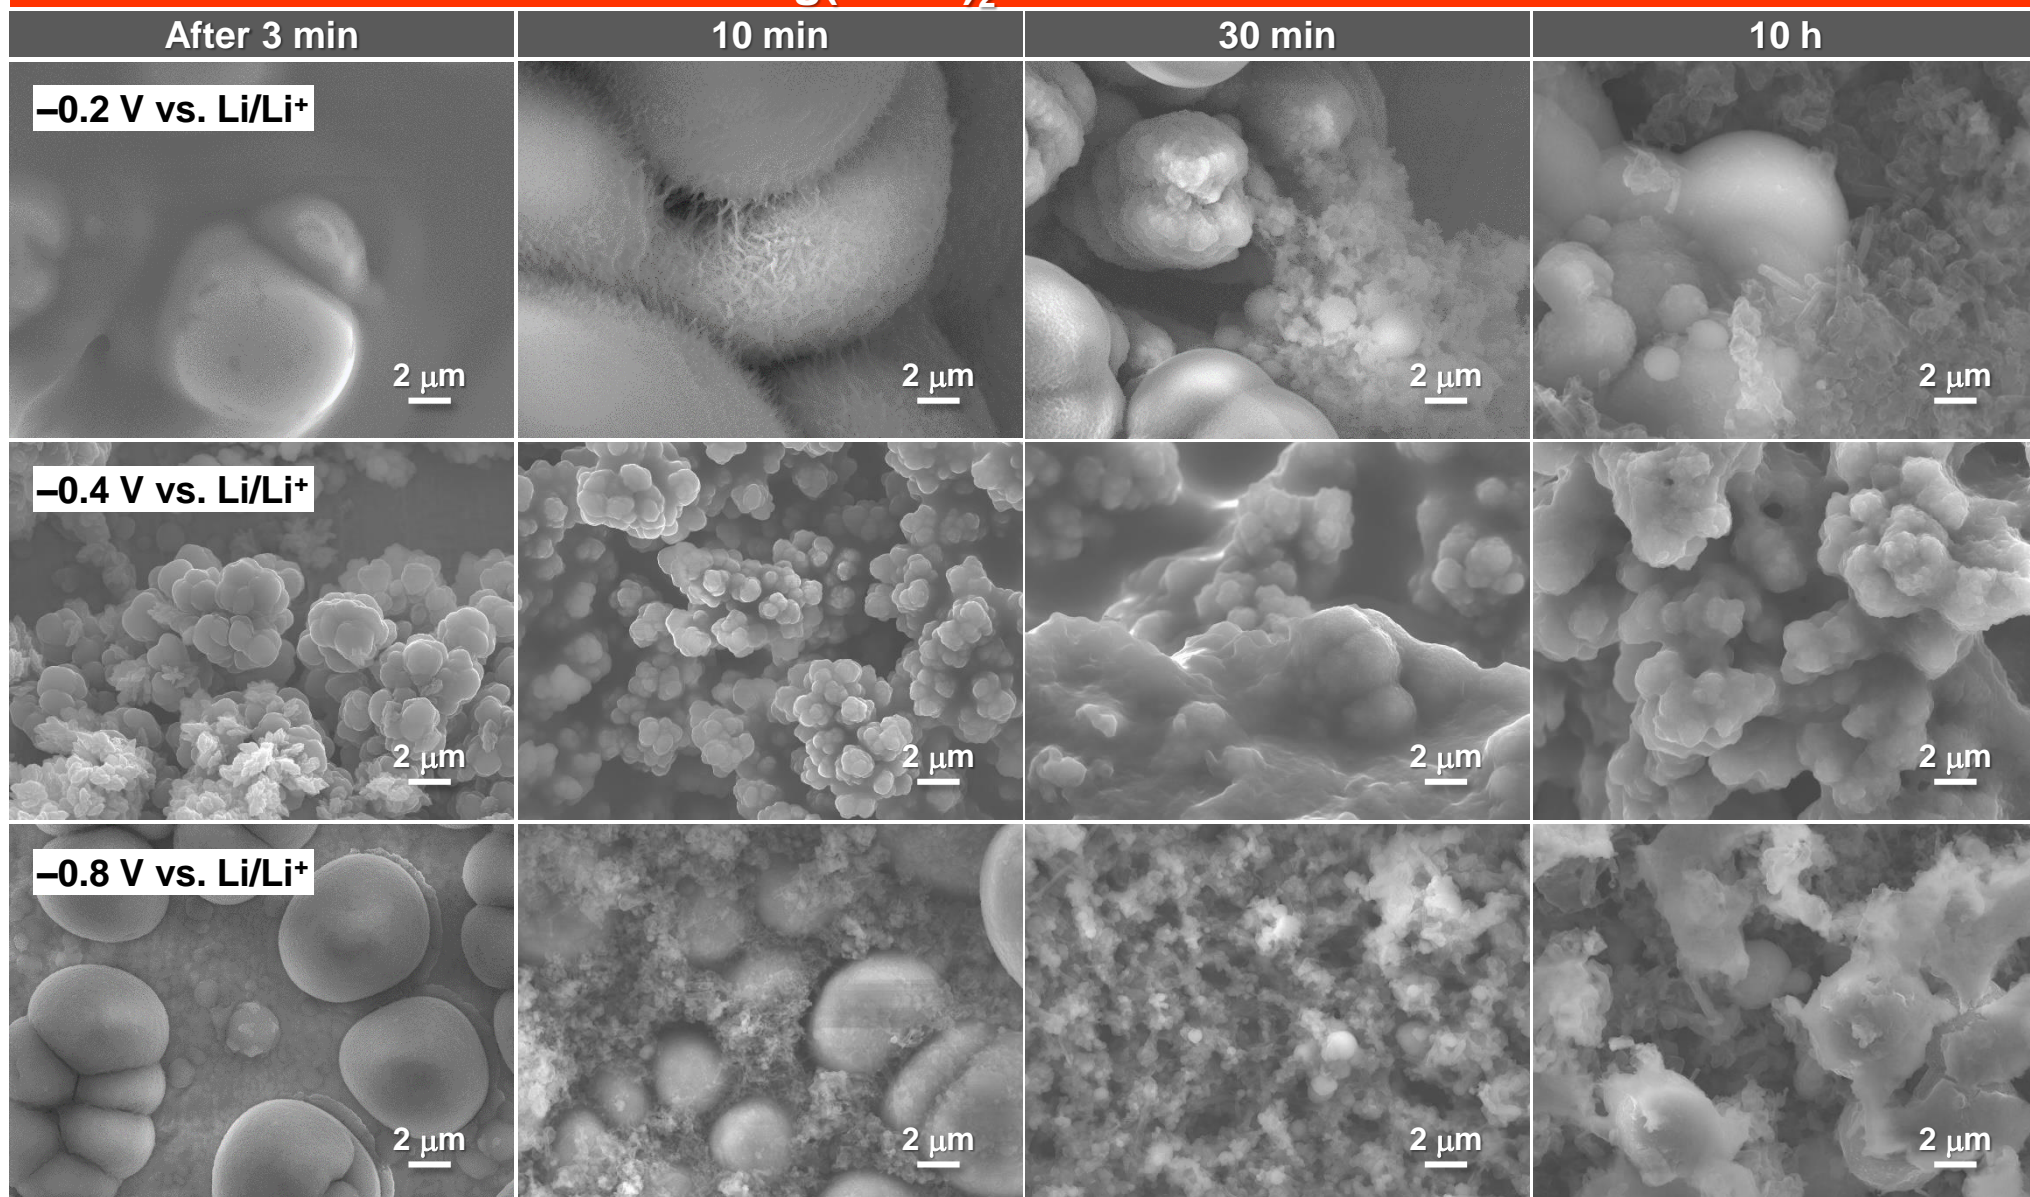

**Figure S5.** Enlarged views of FE-SEM images for deposits obtained from 0.5 M Mg(TFSA)<sub>2</sub> + 0.5 M LiTFSA/G3 at various potentials vs. Li/Li<sup>+</sup>.

0.5 M Mg(TFSA)<sub>2</sub> + 0.5 M LiTFSA/G3 (Low Magnification)

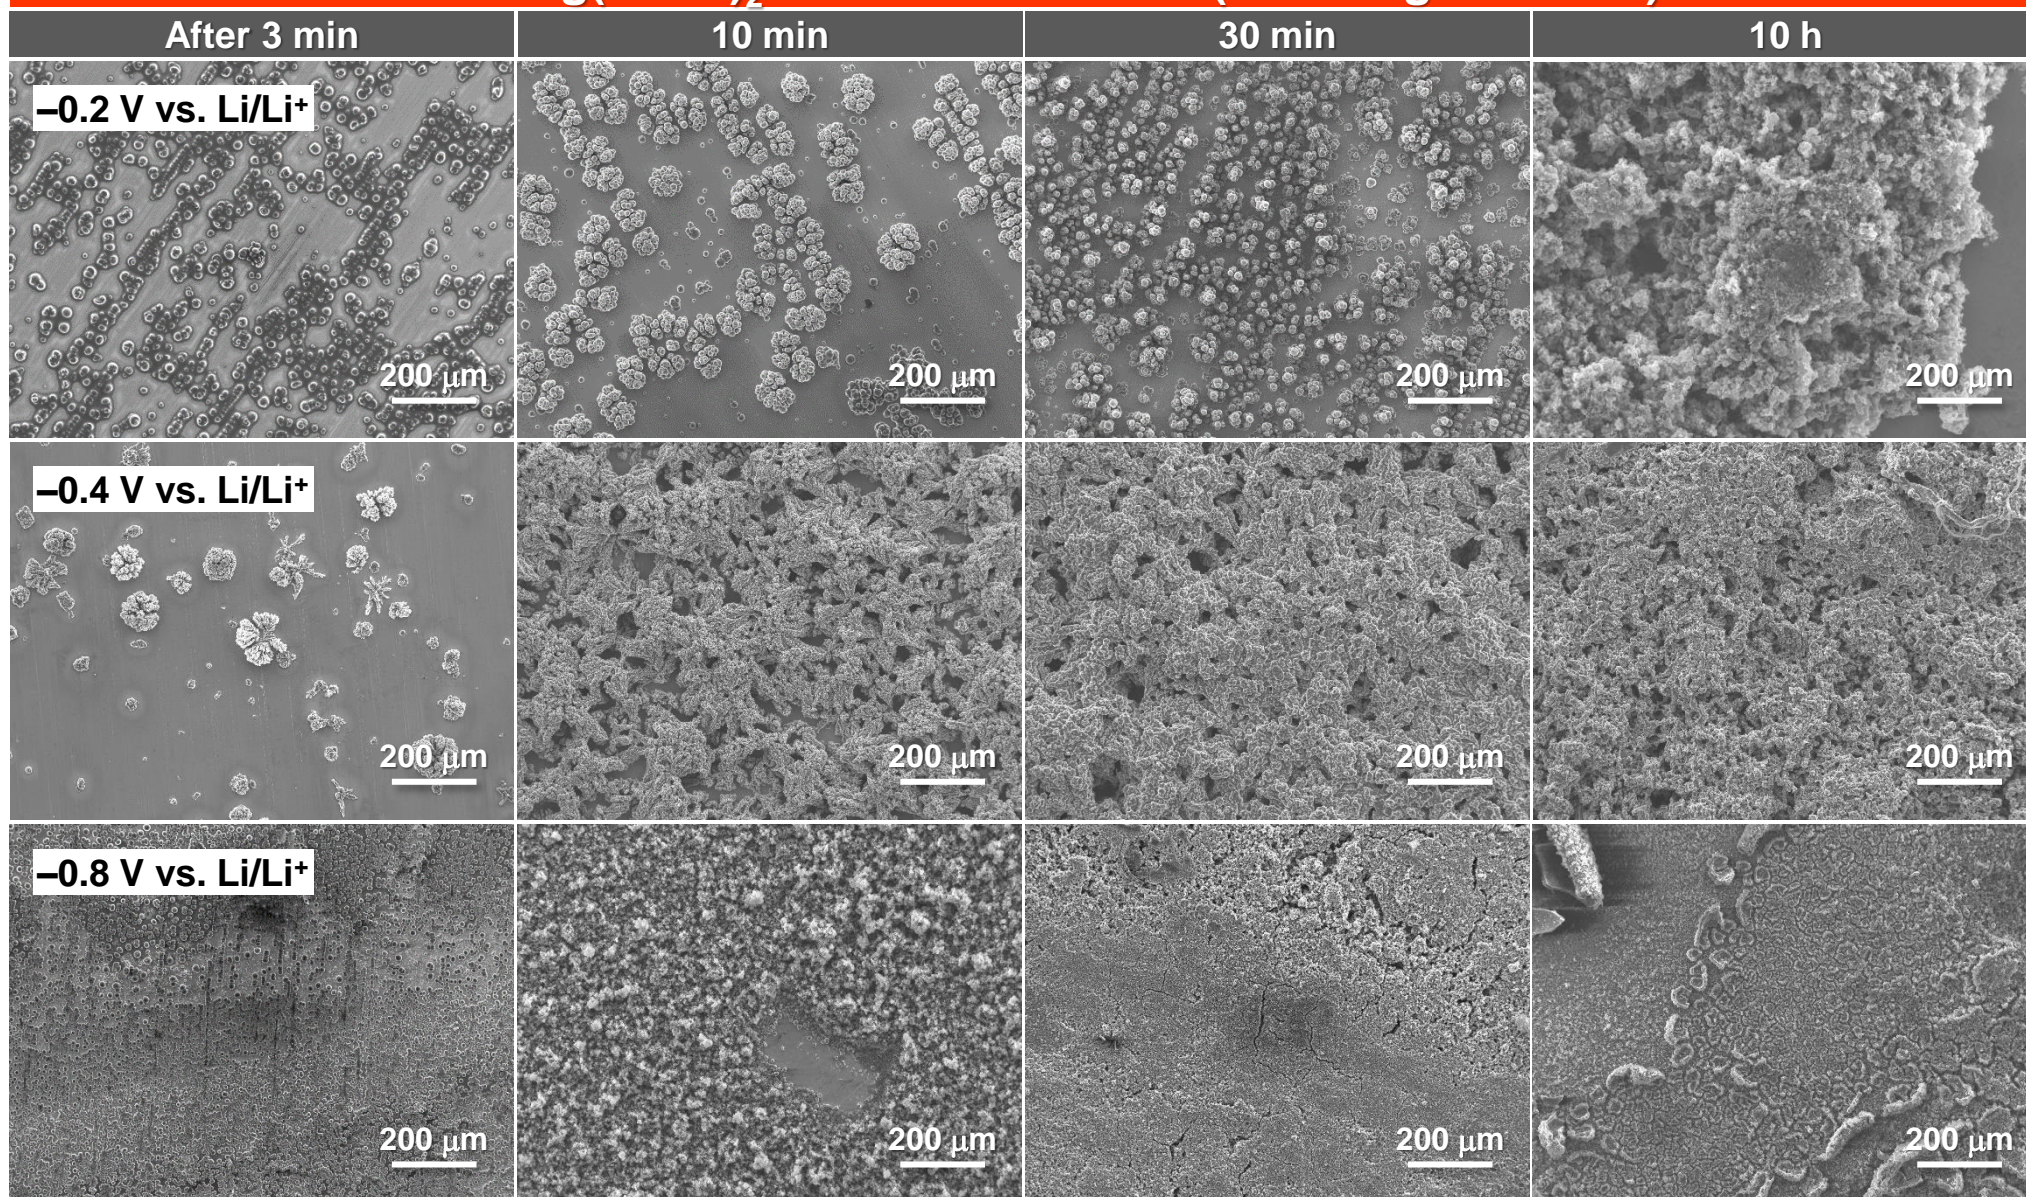

**Figure S6.** FE-SEM images for deposits obtained from 0.5 M Mg(TFSA)<sub>2</sub> + 0.5 M LiTFSA/G3 at various potentials vs. Li/Li<sup>+</sup>. Magnification:  $\times 100$ .

0.5 M Mg(TFSA)<sub>2</sub> + 0.5 M LiTFSA/G3

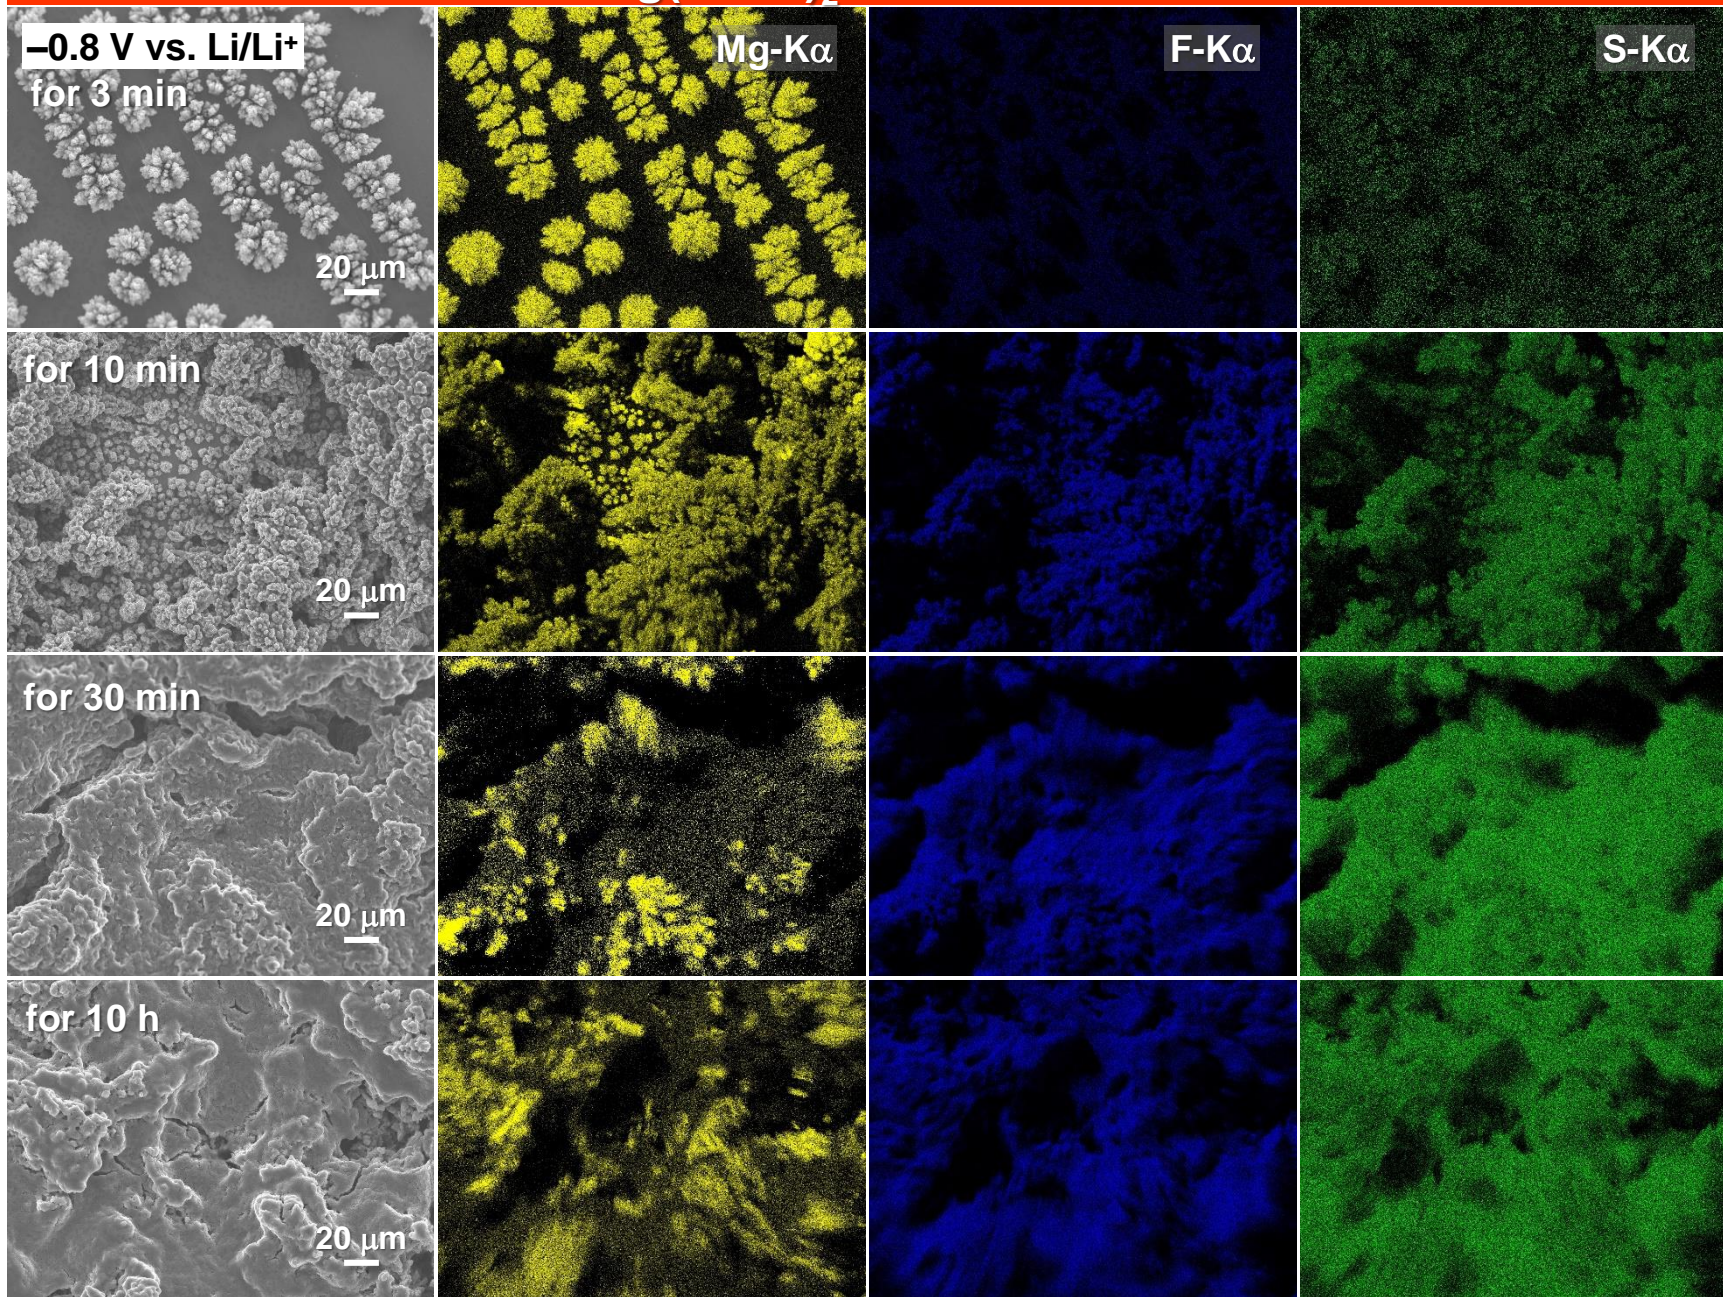

**Figure S7.** FE-SEM images and corresponding EDS mapping for deposits obtained from 0.5 M Mg(TFSA)<sub>2</sub> + 0.5 M LiTFSA/G3 for various time at the constant potential electrolysis at  $-0.8$  V vs. Li/Li<sup>+</sup>.



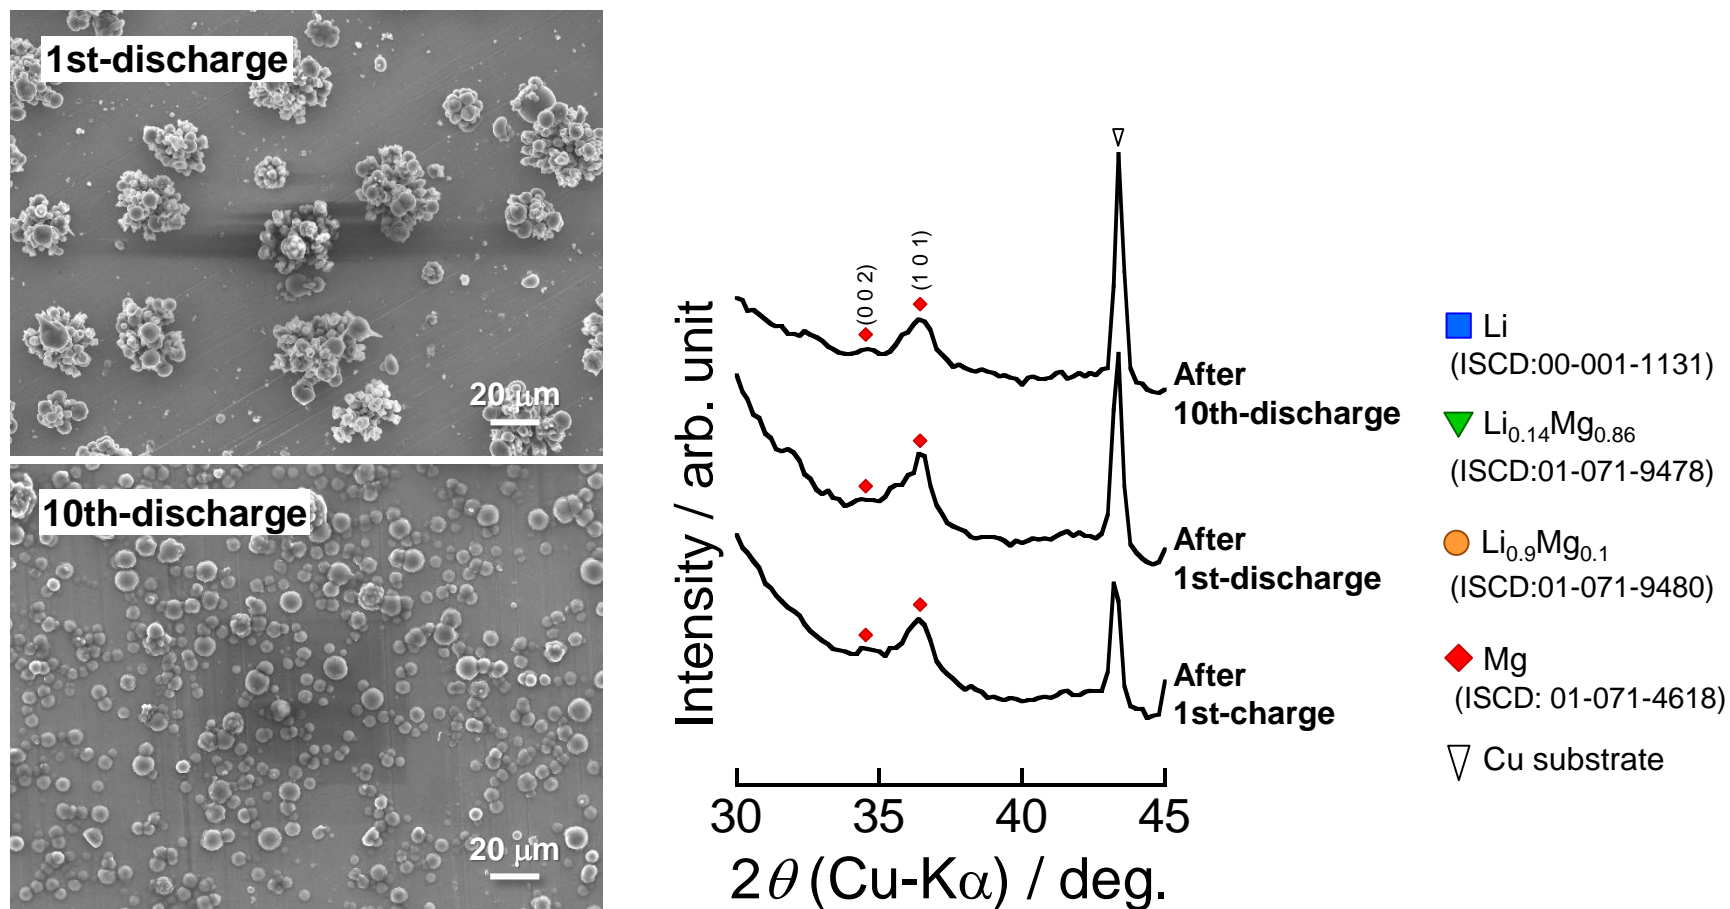

**Figure S8.** FE-SEM images and XRD patterns of deposits obtained in discharge state at the first cycle and 10th cycle in the electrolyte of 0.5 M  $\text{Mg}(\text{TFSA})_2$  + 0.5 M  $\text{LiTFSA}/\text{G3}$  under constant current condition ( $0.1 \text{ mA cm}^{-2}$ ). The deposits were attributed to Mg metal, which means that Mg could not dissolve into the electrolyte as Mg ion. This is the reason for the low Coulombic efficiency.
